# Supplementary material for: Changes in renal function and indicators in chronic hepatitis B patients undergoing antiviral therapy for 48 weeks: A prospective cohort study in China
Source: Research Square preprint supplement (doi:10.21203/rs.3.rs-8719411/v1), 2026-02-23
Supplement: Supplementary file 1 [file ad9e31476ae347c428a71103.docx]

**Renal function changes in patients with chronic hepatitis B treated with pegylated interferon combined with nucleos(t)ide analogs**

**Supplementary Materials**

**Supplementary figures**


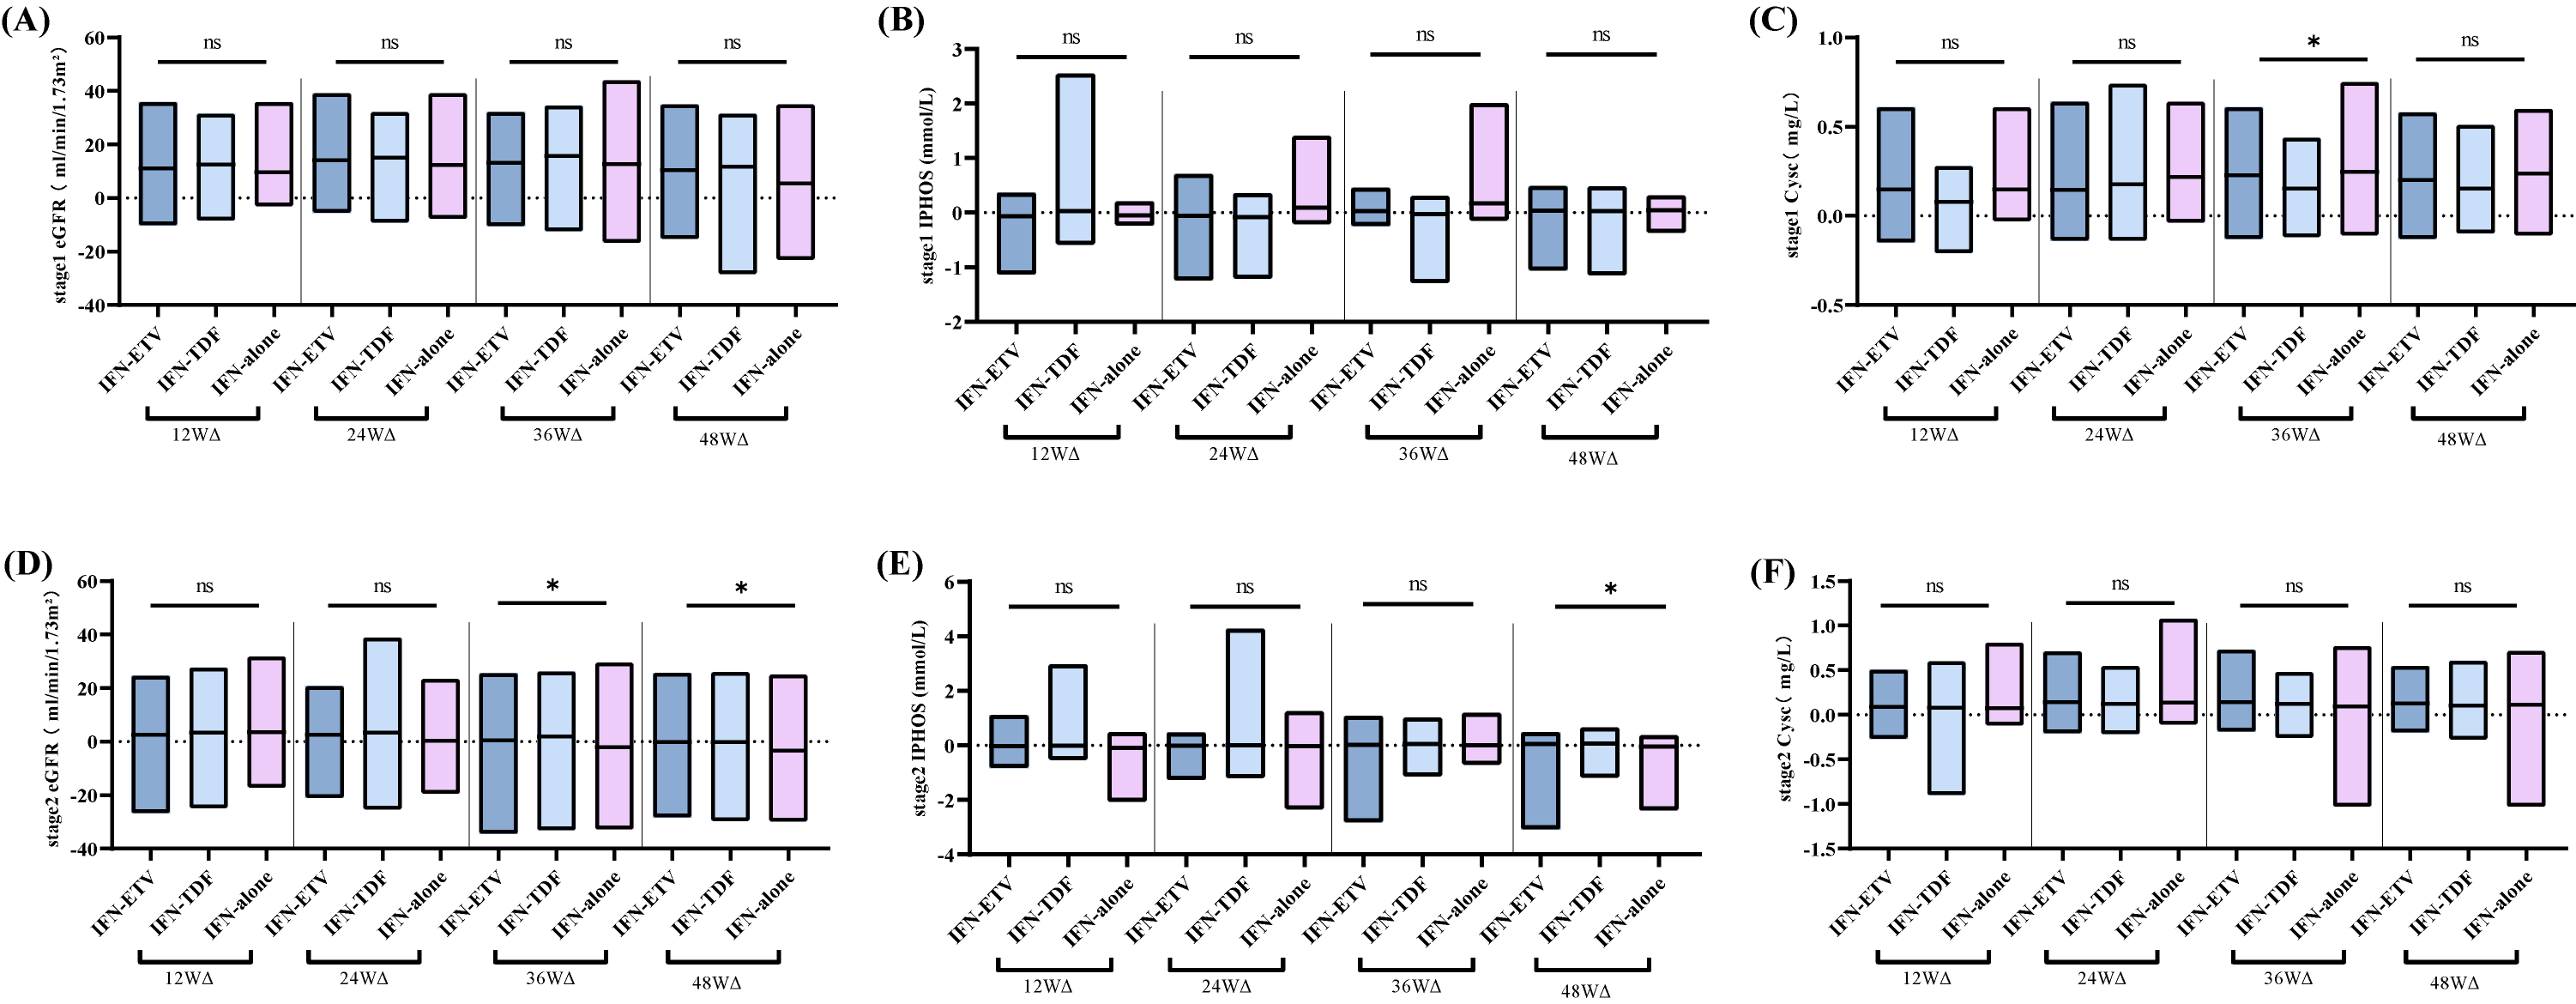


FigureS3.Variations at the different stages of renal function.

1. . Variation in eGFR at stage 1. (B). Variation in IPHOS at stage 1. (C). Variation in Cysc at stage 1. (D). Variation in the eGFR at stage 2. (E). Variation in IPHOS at stage 2. (F). Variation in Cysc at stage 2.
