# Supplementary material for: Changes in renal function and indicators in chronic hepatitis B patients undergoing antiviral therapy for 48 weeks: A prospective cohort study in China
Source: Research Square preprint supplement (doi:10.21203/rs.3.rs-8719411/v1), 2026-02-23
Supplement: Supplementary file 2 [file b9d9571fed6a2be28a108794.docx]

**Renal function changes in patients with chronic hepatitis B treated with pegylated interferon combined with nucleos(t)ide analogs**

**Supplementary Materials**

**Supplementary Figure**

FigureS4 Analysis of factors predicting renal outcomes at 48 weeks.


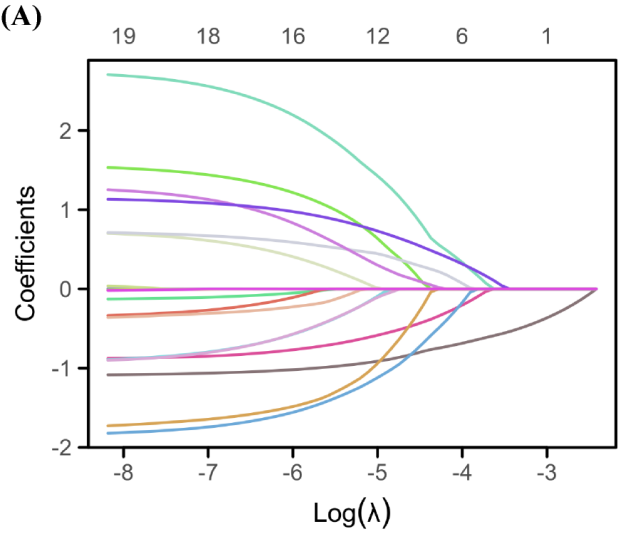

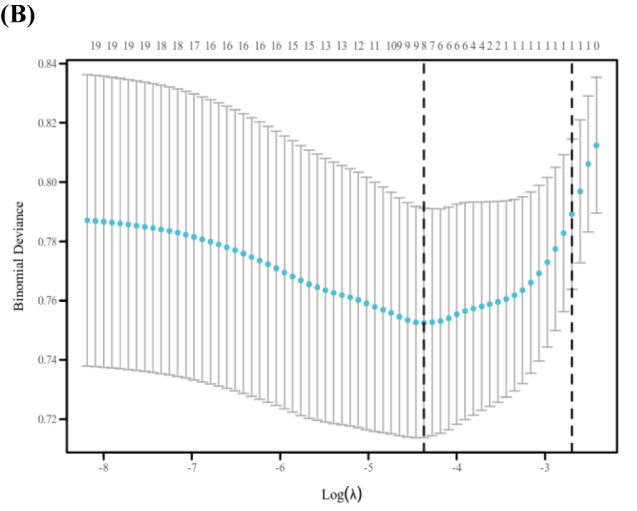

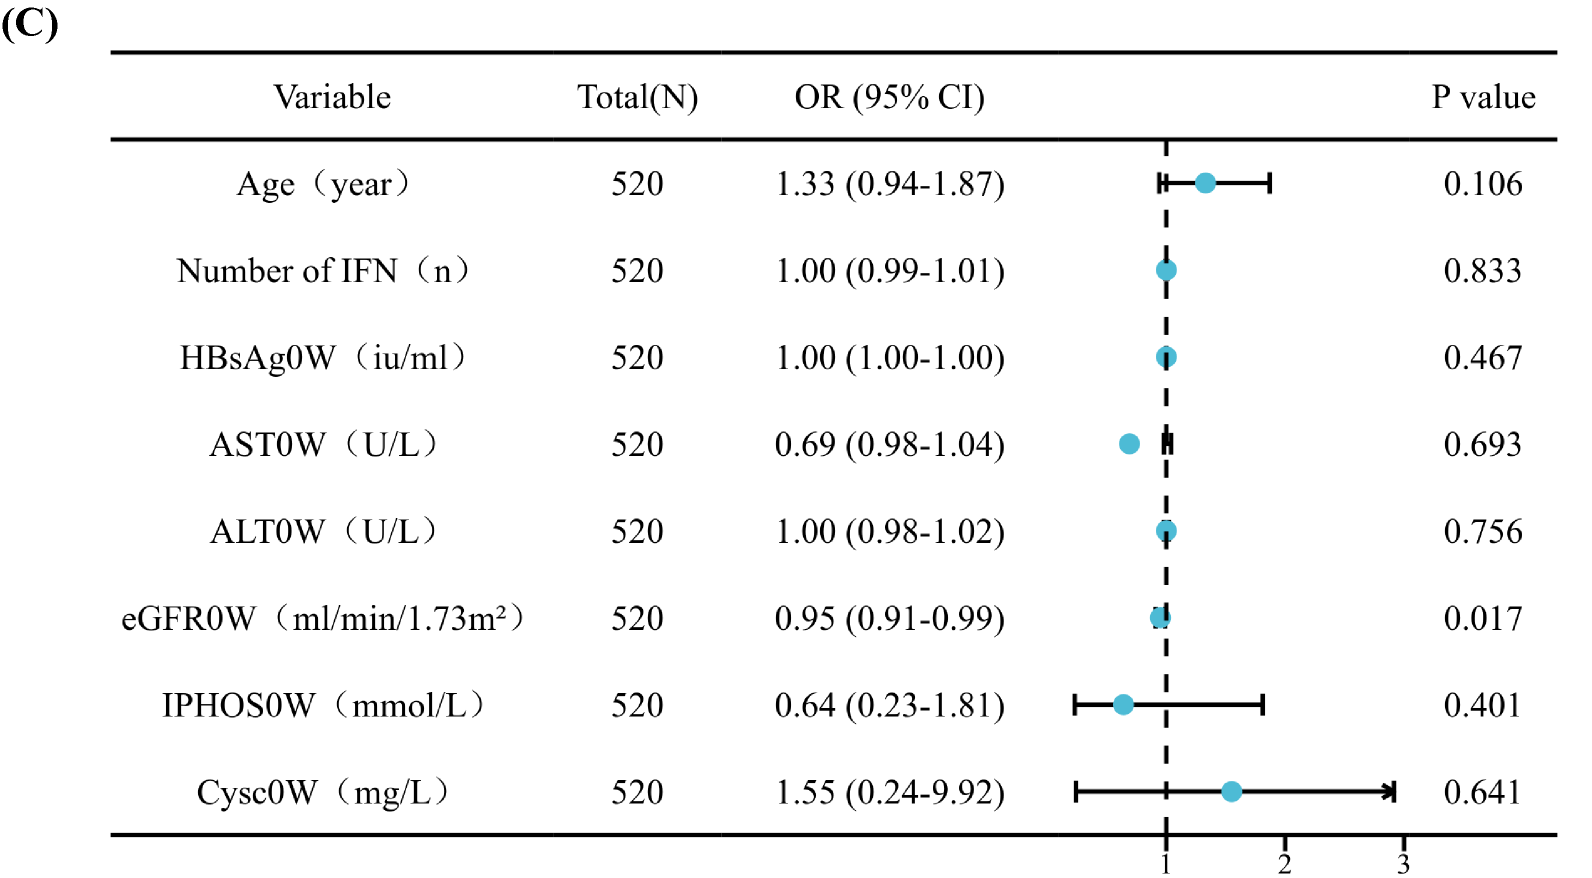


1. . Lasso coefficient path diagram. (B). LASSO regression analysis cross-validation. (C).Multivariate analysis forest plot of renal outcomes at 48 weeks.
