# Supplementary material for: Changes in renal function and indicators in chronic hepatitis B patients undergoing antiviral therapy for 48 weeks: A prospective cohort study in China
Source: Research Square preprint supplement (doi:10.21203/rs.3.rs-8719411/v1), 2026-02-23
Supplement: Supplementary file 3 [file dd4831303f425f25cd1de059.docx]

**Supplementary Materials**

**TableS2.Characteristics of Female patients with different renal function status after 48 weeks of interferon combined with oral antiviral drugs.**

| **Baseline Characteristics** | **Mild impairment of renal function （N=4）** | **Normal renal function**  **（N=73）** | ***P* value** |
| --- | --- | --- | --- |
| **Age（year）** | **20.00±0.00** | **20.00±0.00** | **0.457** |
| **Number of IFN** | **47.50±12.04** | **45.05±15.17** | **0.833** |
| **HBsAg（iu/ml）** |  |  |  |
| **0W** | **136.38±104.27** | **374.17±500.05** | **0.320** |
| **12W** | **7.33±8.28** | **242.21±438.40** | **0.157** |
| **24W** | **4.57±9.06** | **136.75±335.49** | **0.039** |
| **36W** | **1.04±1.18** | **122.01±314.37** | **0.107** |
| **48W** | **0.45±0.50** | **190.85±724.00** | **0.097** |
| **Biochemistry data** |  |  |  |
| **AST（U/L）** |  |  |  |
| **0W** | **20.75±3.86** | **25.42±15.80** | **0.557** |
| **12W** | **60.00±26.96** | **59.60±31.72** | **0.974** |
| **24W** | **55.50±14.34** | **52.17±27.02** | **0.587** |
| **36W** | **35.14±9.54** | **47.21±26.63** | **0.430** |
| **48W** | **31.46±9.09** | **32.71±22.13** | **0.603** |
| **ALT（U/L）** |  |  |  |
| **0W** | **16.50±3.87** | **24.29±18.70** | **0.404** |
| **12W** | **60.00±29.86** | **62.53±38.73** | **0.956** |
| **24W** | **46.50±15.80** | **50.54±30.85** | **0.851** |
| **36W** | **32.10±16.86** | **45.17±26.81** | **0.430** |
| **48W** | **61.50±53.23** | **35.74±43.54** | **0.355** |
| **eGFR（ml/min/1.73m²）** |  |  |  |
| **0W** | **95.01±10.54** | **112.93±15.71** | **0.012** |
| **12W** | **99.78±14.05** | **116.02±12.72** | **0.024** |
| **24W** | **97.57±16.42** | **116.29±12.15** | **0.014** |
| **36W** | **96.31±9.46** | **113.49±13.22** | **0.011** |
| **48W** | **83.53±4.91** | **114.42±10.17** | **＜0.001** |
| **IPHOS（mmol/L）** |  |  |  |
| **0W** | **0.99±0.14** | **1.06±0.13** | **0.187** |
| **12W** | **0.92±0.04** | **1.04±0.19** | **0.067** |
| **24W** | **0.94±0.09** | **1.08±0.15** | **0.071** |
| **36W** | **0.98±0.07** | **1.14±0.16** | **0.024** |
| **48W** | **1.04±0.09** | **1.13±0.14** | **0.137** |
| **Cysc（mg/L）** |  |  |  |
| **0W** | **0.80±0.09** | **0.80±0.15** | **0.833** |
| **12W** | **0.81±0.08** | **0.87±0.18** | **0.298** |
| **24W** | **0.87±0.16** | **0.93±0.19** | **0.715** |
| **36W** | **1.03±0.14** | **0.92±0.18** | **0.102** |
| **48W** | **0.96±0.14** | **0.89±0.18** | **0.332** |
