# Supplementary material for: Changes in renal function and indicators in chronic hepatitis B patients undergoing antiviral therapy for 48 weeks: A prospective cohort study in China
Source: Research Square preprint supplement (doi:10.21203/rs.3.rs-8719411/v1), 2026-02-23
Supplement: Supplementary file 4 [file e8143e7cb3ff8b18be72f692.docx]

**Renal function changes in patients with chronic hepatitis B treated with pegylated interferon combined with nucleos(t)ide analogs**

**Supplementary Materials**

**TableS1.Characteristics of Male patients with different renal function status after 48 weeks of interferon combined with oral antiviral drugs.**

| **Baseline Characteristics** | **Mild impairment of renal function （N=69）** | **Normal renal function （N=374）** | ***P* value** |
| --- | --- | --- | --- |
| **Age（year）** | **41.90±8.79** | **48.83±19.57** | **＜0.001** |
| **Number of IFN** | **48.67±17.01** | **48.83±19.57** | **0.559** |
| **HBsAg（iu/ml）** |  |  |  |
| **0W** | **375.75±371.35** | **432.23±389.53** | **0.229** |
| **12W** | **291.83±375.97** | **305.60±409.95** | **0.756** |
| **24W** | **225.70±373.89** | **195.05±327.27** | **0.169** |
| **36W** | **186.75±348.98** | **190.88±833.27** | **0.205** |
| **48W** | **168.82±323.11** | **135.86±247.75** | **0.347** |
| **Biochemistry data** |  |  |  |
| **AST（U/L）** |  |  |  |
| **0W** | **27.94±9.20** | **28.60±14.37** | **0.328** |
| **12W** | **55.43±42.15** | **58.24±47.59** | **0.535** |
| **24W** | **52.30±49.67** | **52.93±34.81** | **0.250** |
| **36W** | **41.59±20.27** | **42.92±26.05** | **0.861** |
| **48W** | **34.91±17.53** | **43.63±87.60** | **0.745** |
| **ALT（U/L）** |  |  |  |
| **0W** | **31.09±14.06** | **33.05±20.46** | **0.776** |
| **12W** | **63.83±63.49** | **69.59±47.03** | **0.060** |
| **24W** | **54.70±67.11** | **62.95±61.97** | **0.007** |
| **36W** | **43.35±19.54** | **47.76±40.20** | **0.693** |
| **48W** | **44.39±66.61** | **46.43±63.51** | **0.178** |
| **eGFR（ml/min/1.73m²）** |  |  |  |
| **0W** | **87.04±12.97** | **106.18±13.22** | **＜0.001** |
| **12W** | **91.61±11.32** | **111.09±12.04** | **＜0.001** |
| **24W** | **91.78±11.23** | **110.90±11.61** | **＜0.001** |
| **36W** | **89.18±12.15** | **109.81±10.94** | **＜0.001** |
| **48W** | **80.87±7.79** | **108.76±10.28** | **＜0.001** |
| **IPHOS（mmol/L）** |  |  |  |
| **0W** | **1.03±0.26** | **1.05±0.27** | **0.032** |
| **12W** | **1.01±0.40** | **1.02±0.32** | **0.326** |
| **24W** | **1.00±0.20** | **1.04±0.31** | **0.395** |
| **36W** | **1.09±0.29** | **1.07±0.22** | **0.857** |
| **48W** | **1.09±0.15** | **1.08±0.16** | **0.515** |
| **Cysc（mg/L）** |  |  |  |
| **0W** | **0.94±0.14** | **0.87±0.13** | **＜0.001** |
| **12W** | **1.09±0.17** | **0.97±0.15** | **＜0.001** |
| **24W** | **1.12±0.18** | **1.01±0.15** | **＜0.001** |
| **36W** | **1.13±0.19** | **1.00±0.15** | **＜0.001** |
| **48W** | **1.13±0.17** | **1.00±0.15** | **＜0.001** |
