# Supplementary material for: Changes in renal function and indicators in chronic hepatitis B patients undergoing antiviral therapy for 48 weeks: A prospective cohort study in China
Source: Research Square preprint supplement (doi:10.21203/rs.3.rs-8719411/v1), 2026-02-23
Supplement: Supplementary file 5 [file f3d6524e34f2c2be95f5136c.docx]

**Renal function changes in patients with chronic hepatitis B treated with pegylated interferon combined with nucleos(t)ide analogs**

Jinhua Zhao1,2 #, Lili Wu1,2 #, Xiaoan Yang1,2, Zhiliang Gao1,2 *, Hong Deng1,2 *

1Department of Infectious Diseases, Third Affiliated Hospital of Sun Yat-sen University, Guangzhou, China

2Guangdong Provincial Key Laboratory of Liver Disease Research, Third Affiliated Hospital of Sun Yat-sen University, Guangzhou, China

**Supplementary Materials**

**TableS4. Cure status、gender、age and renal function distribution of patients with three treatment regimens.**

| **Variable** | **IFN-ETV**  **（N=208）** | **IFN-TDF**  **（N=208）** | **IFN alone**  **（N=104）** | ***P* value** |
| --- | --- | --- | --- | --- |
| **Cure status** |  |  |  | **0.472** |
| **Cured group** | **127（61%）** | **123（59%）** | **56（54%）** |  |
| **Age（year）** |  |  |  | **0.747** |
| **＜20** | **0** | **1** | **0** |  |
| **20-30** | **26** | **23** | **8** |  |
| **30-40** | **64** | **81** | **38** |  |
| **40-50** | **85** | **72** | **40** |  |
| **50-60** | **32** | **29** | **17** |  |
| **＞60** | **1** | **2** | **1** |  |
| **Sexl** |  |  |  | **0.955** |
| **Female** | **176（85%）** | **178（86%）** | **89（86%）** |  |
| **Renal function** |  |  |  | **0.992** |
| **Mild impairment** | **29** | **29** | **15** |  |
| **Normal** | **179** | **179** | **89** |  |
